# Supplementary material
Source: PubMed Central journal article supplement (PMC1852363)
Supplement: biophysj_106.097352v2_1.pdf [file biophysj_106.097352v2_1.pdf]

**Partial atomic charges for the PNA backbone.** Partial atomic charges for the atoms of the PNA backbone are listed in the table below.

---

| atom name | atom type | partial atomic charge |
|-----------|-----------|-----------------------|
| C1'       | C         | 0.51                  |
| O1'       | O         | -0.51                 |
| C2'       | CT2       | -0.16                 |
| H2'       | HB        | 0.09                  |
| H2''      | HB        | 0.09                  |
| N2'       | NH3       | -0.07                 |
| C5'       | CT2       | -0.16                 |
| H5'       | HB        | 0.09                  |
| H5''      | HB        | 0.09                  |
| C6'       | CT2       | 0.08                  |
| H6'       | HB        | 0.04                  |
| H6''      | HB        | 0.04                  |
| N1'       | NH1       | -0.47                 |
| H1'       | H         | 0.31                  |
| C3'       | C         | 0.51                  |
| O3'       | O         | -0.51                 |
| C4'       | CT2       | -0.15                 |
| H4'       | HB        | 0.09                  |
| H4''      | HB        | 0.09                  |

---

**Force field parameters.** Below we list the additional PNA parameters used in our simulations that are not provided in the standard CHARMM27 parameter files. The last column contains information about reference systems that the data are from.

Bonds:

|     |      |       |        |                                       |
|-----|------|-------|--------|---------------------------------------|
| CT2 | NN2  | 400.0 | 1.460  | CN8 - NN2                             |
| CT2 | NN2B | 400.0 | 1.458  | CN8 - NN2B                            |
| NH3 | C    | 370.0 | 1.3389 | +/- 0.0091, 1PUP cryst. data, NH1 - C |

Angles:

|      |      |     |       |       |                                          |
|------|------|-----|-------|-------|------------------------------------------|
| CN1  | NN2  | CT2 | 70.0  | 115.4 | CN1 - NN2 - CN9                          |
| CN1T | NN2B | CT2 | 70.0  | 116.0 | CN1T - NN2B - CN9                        |
| CN3  | NN2  | CT2 | 70.0  | 120.5 | CN3 - NN2 - CN9                          |
| CN3  | NN2B | CT2 | 70.0  | 122.0 | CN3 - NN2B - CN9                         |
| CN4  | NN2  | CT2 | 70.0  | 127.8 | CN4 - NN2 - CN9                          |
| CN4  | NN2B | CT2 | 70.0  | 126.9 | CN4 - NN2B - CN8                         |
| CN5  | NN2  | CT2 | 70.0  | 125.9 | CN5 - NN2 - CN9                          |
| CN5  | NN2B | CT2 | 70.0  | 125.9 | CN5 - NN2B - CN8                         |
| CT2  | NH3  | C   | 50.0  | 122.0 | +/- 2.2, 1PUP cryst. data, CT2 - NH1 - C |
| CT2  | NH3  | CT2 | 60.0  | 109.5 | 26.00 2.466 CTL2 - NTL - CTL2            |
| HB   | CT2  | CT2 | 26.5  | 110.1 | 22.53 2.1790 HA - CT2 - CT2              |
| NH3  | C    | CT2 | 80.0  | 118.6 | +/- 1.5, 1PUP cryst. data, NH1 - C - CT2 |
| NH3  | CT2  | HB  | 45.0  | 107.5 | 35.00 2.1010 NN6 - CN8 - HN8             |
| NN2  | CT2  | HB  | 33.43 | 110.1 | HN8 - CN8 - NN2                          |
| NN2B | CT2  | HB  | 33.43 | 110.1 | HN8 - CN8 - NN2B                         |
| NN2  | CT2  | C   | 43.7  | 109.3 | +/- 1.2, 1PUP cryst. data, NH3 - CT2 - C |
| NN2B | CT2  | C   | 43.7  | 109.3 | +/- 1.2, 1PUP cryst. data, NH3 - CT2 - C |
| O    | C    | NH3 | 80.0  | 120.6 | +/- 1.3, 1PUP cryst. data, O - C - NH1   |

Dihedrals:

|      |      |     |    |      |   |     |                         |
|------|------|-----|----|------|---|-----|-------------------------|
| CN1  | NN2  | CT2 | C  | 0.19 | 3 | 0.0 | CN5 - NN2B - CT2 - C    |
| CN1  | NN2  | CT2 | HB | 0.19 | 3 | 0.0 | CN1 - NN2 - CN9 - HN9   |
| CN1T | NN2B | CT2 | C  | 0.19 | 3 | 0.0 | CN5 - NN2B - CT2 - C    |
| CN1T | NN2B | CT2 | HB | 0.19 | 3 | 0.0 | CN1T - NN2B - CN9 - HN9 |
| CN3  | NN2  | CT2 | C  | 0.00 | 3 | 0.0 | CN4 - NN2B - CT2 - C    |
| CN3  | NN2  | CT2 | HB | 0.00 | 3 | 0.0 | CN3 - NN2 - CN9 - HN9   |
| CN3  | NN2B | CT2 | C  | 0.00 | 3 | 0.0 | CN4 - NN2B - CT2 - C    |
| CN3  | NN2B | CT2 | HB | 0.00 | 3 | 0.0 | CN3 - NN2B - CN9 - HN9  |
| CN4  | NN2  | CT2 | C  | 0.00 | 3 | 0.0 | CN4 - NN2B - CT2 - C    |
| CN4  | NN2  | CT2 | HB | 0.00 | 3 | 0.0 | CN4 - NN2 - CN9 - HN9   |
| CN4  | NN2B | CT2 | C  | 0.00 | 3 | 0.0 | CN4 - NN2B - CN8 - CN9  |
| CN4  | NN2B | CT2 | HB | 0.00 | 3 | 0.0 | CN4 - NN2 - CN8 - HN8   |
| CN5  | NN2  | CT2 | C  | 0.19 | 3 | 0.0 | CN5 - NN2B - CT2 - C    |
| CN5  | NN2  | CT2 | HB | 0.19 | 3 | 0.0 | CN5 - NN2 - CN9 - HN9   |
| CN5  | NN2B | CT2 | C  | 0.19 | 3 | 0.0 | CN5 - NN2B - CN8 - CN9  |
| CN5  | NN2B | CT2 | HB | 0.19 | 3 | 0.0 | CN5 - NN2 - CN8 - HN8   |

|     |     |     |     |      |   |       |                     |
|-----|-----|-----|-----|------|---|-------|---------------------|
| CT2 | NH3 | C   | CT2 | 1.40 | 2 | 180.0 | (13)                |
| CT2 | NH3 | C   | O   | 1.40 | 2 | 180.0 | (13)                |
| H   | NH1 | CT2 | CT2 | 0.00 | 1 | 0.0   | H - NH1 - CT2 - CT3 |
| NH2 | CC  | CT2 | HB  | 0.00 | 3 | 180.0 | NH2 - CC - CT2 - HA |
| X   | CT2 | C   | X   | 0.05 | 6 | 180.0 | X - CTL2 - CL - X   |

Improper:

|      |      |     |     |        |   |      |                   |
|------|------|-----|-----|--------|---|------|-------------------|
| NN2  | CN1  | CN3 | CT2 | 90.00  | 0 | 0.00 | CN2 - X - X - NN1 |
| NN2B | CN1T | CN3 | CT2 | 90.00  | 0 | 0.00 | CN2 - X - X - NN1 |
| NN2  | CN4  | CN5 | CT2 | 90.00  | 0 | 0.00 | CN2 - X - X - NN1 |
| NN2B | CN4  | CN5 | CT2 | 90.00  | 0 | 0.00 | CN2 - X - X - NN1 |
| OC   | X    | X   | CC  | 100.00 | 0 | 0.00 | OBL - X - X - CL  |
| NH3  | CT1  | CT2 | C   | 90.00  | 0 | 0.00 | CN2 - X - X - NN1 |
| NH3  | CT2  | CT2 | C   | 90.00  | 0 | 0.00 | CN2 - X - X - NN1 |
